# Supplementary material
Source: publisher figshare collection journal article supplement (https://acs.figshare.com/ndownloader/files/9132559)
Supplement: Supplementary file 1 [file 9132559]

## Supporting Information

### **Spray Pyrolysis Deposition of ZnFe<sub>2</sub>O<sub>4</sub>/Fe<sub>2</sub>O<sub>3</sub> Composite Thin Films on Hierarchical 3-D Nanospikes for Efficient Photoelectrochemical Oxidation of Water**

Shabeeb Hussain,<sup>a</sup> Shazia Hussain,<sup>a</sup> Aashir Waleed,<sup>b,c</sup> Mohammad Mahdi Tavakoli,<sup>b,d</sup> Shihe Yang,<sup>e</sup> Muhammad Khawar Rauf,<sup>a</sup> Zhiyong Fan,<sup>b\*</sup> and Muhammad Arif Nadeem<sup>a\*</sup>

<sup>a</sup>*Catalysis and Nanomaterials Lab 27, Department of Chemistry, Quaid-i-Azam University, Islamabad 4533, Pakistan.*

<sup>b</sup>*Department of Electronic and Computer Engineering, Hong Kong University of Science and Technology, Clear Water Bay, Kowloon, Hong Kong SAR, China.*

<sup>c</sup>*Department of Electrical Engineering, University of Engineering and Technology, Lahore (FSD Campus), 3.5 km, Khurrianwala-Makuana Bypass, Faisalabad, 38000, Pakistan*

<sup>d</sup>*Department of Materials Science and Engineering, Sharif University of Technology, Azadi Street, 113659466, Tehran, Iran.*

<sup>e</sup>*Department of Chemistry, William Mong Institute of Nano Science and Technology, The Hong Kong University of Science and Technology, Clear Water Bay, Kowloon, Hong Kong.*

**\*Corresponding Author:** Muhammad Arif Nadeem, [manadeem@qau.edu.pk](mailto:manadeem@qau.edu.pk), +92-51-9064-2062; Zhiyong Fan [eezfan@ust.hk](mailto:eezfan@ust.hk)

**XRF results:**

The surface composition of the prepared composites were analysed by XRF and the results are presented in Figure S1. The simple molar ratio between Zn and Fe in composite ZF3 was kept to be 1:8 which is consistent with the XRF results, Figure S1 (A). The simple mole ratio between  $\text{ZnFe}_2\text{O}_4$  and  $\alpha\text{-Fe}_2\text{O}_3$  in composite ZF3 would be 1:3, and can be justified as follows.

$$\begin{array}{ccc} \text{Zn} & : & \text{Fe} \\ 1 & : & 8 \end{array}$$

So the simple ratio between ZnO and  $\alpha\text{-Fe}_2\text{O}_3$  in ZF-3 would be as follows

$$\begin{array}{ccc} \text{ZnO} & : & \text{Fe}_2\text{O}_3 \\ 1 & : & 4 \end{array}$$

One mole of ZnO combine with the one mole of  $\alpha\text{-Fe}_2\text{O}_3$  to form one mole of  $\text{ZnFe}_2\text{O}_4$  as follows.

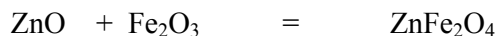

The remaining 3 moles of  $\alpha\text{-Fe}_2\text{O}_3$  will remain as such, therefore the simple molar ratio between  $\text{ZnFe}_2\text{O}_4$  and  $\text{Fe}_2\text{O}_3$  will be 1:3.

According to XRF results shown in figure S1 (B), the simple molar ratio between Zn and Fe in composite ZF2 was 1:6. The simple mole ratio between  $\text{ZnFe}_2\text{O}_4$  and  $\alpha\text{-Fe}_2\text{O}_3$  in ZF2 would be 1:2 and can be justified as under.

$$\begin{array}{ccc} \text{Zn} & : & \text{Fe} \\ 1 & : & 6 \end{array}$$

Ratio between ZnO and  $\alpha\text{-Fe}_2\text{O}_3$  would be as follows.

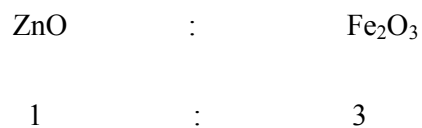

One mole of  $\alpha\text{-Fe}_2\text{O}_3$  out of three moles, combines with ZnO to form  $\text{ZnFe}_2\text{O}_4$ . Therefore, simple ratio between  $\text{ZnFe}_2\text{O}_4$  and  $\alpha\text{-Fe}_2\text{O}_3$  in composite ZF-2 would be 1:2.

Figure S1 (C) shows the XRF results of composite ZF-1 according to which the simple molar ratio between Zn and Fe is 1:4. So the ratio between ZnO and  $\alpha\text{-Fe}_2\text{O}_3$  will be 1:2.

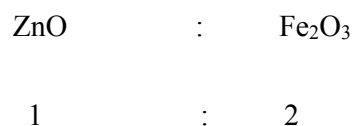

$\text{ZnFe}_2\text{O}_4$  is formed by reacting one mole of ZnO with the one mole of  $\alpha\text{-Fe}_2\text{O}_3$ , so the final ratio between  $\text{ZnFe}_2\text{O}_4$  and  $\alpha\text{-Fe}_2\text{O}_3$  in composite ZF1 would be 1:1.

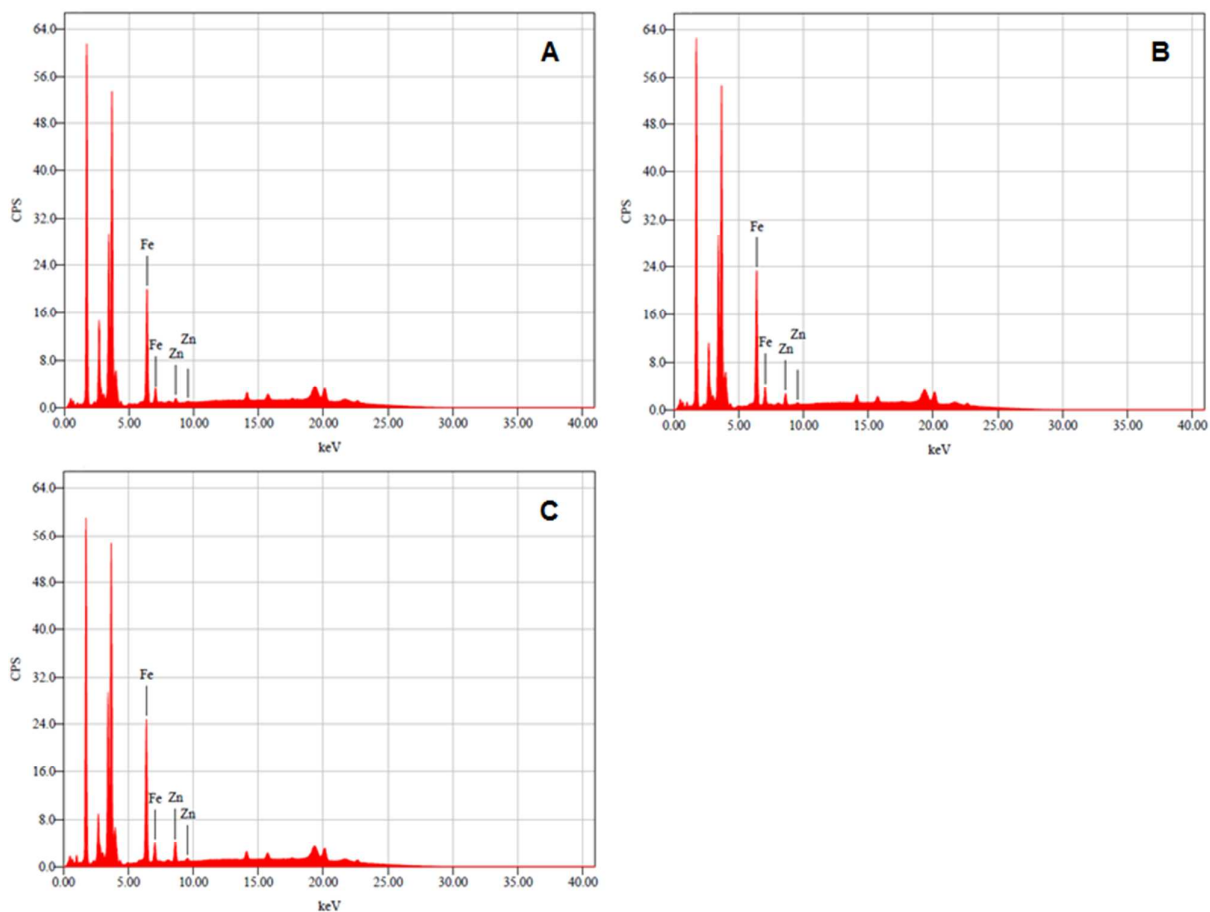

**Figure S1:** XRF results of  $\text{ZnFe}_2\text{O}_4/\alpha\text{-Fe}_2\text{O}_3$  composites, ZF3 (A), ZF2 (B), ZF1 (C)

### Energy dispersive X-Ray spectroscopic (EDS) mapping

The elemental mapping for Zn, Fe, O, Sn, Ti, Pt and Al are shown in figure S2. The protective layers of Ti and Pt against basic electrolyte are clear in their respective elemental mapping shown in Fig S2 (G) and (H). The mapping of Sn of FTO layer can also be seen in section (I) of figure S2. The mapping of other fundamental elements of the composites like Fe and Zn are shown in section (D) and (E) of figure S2.

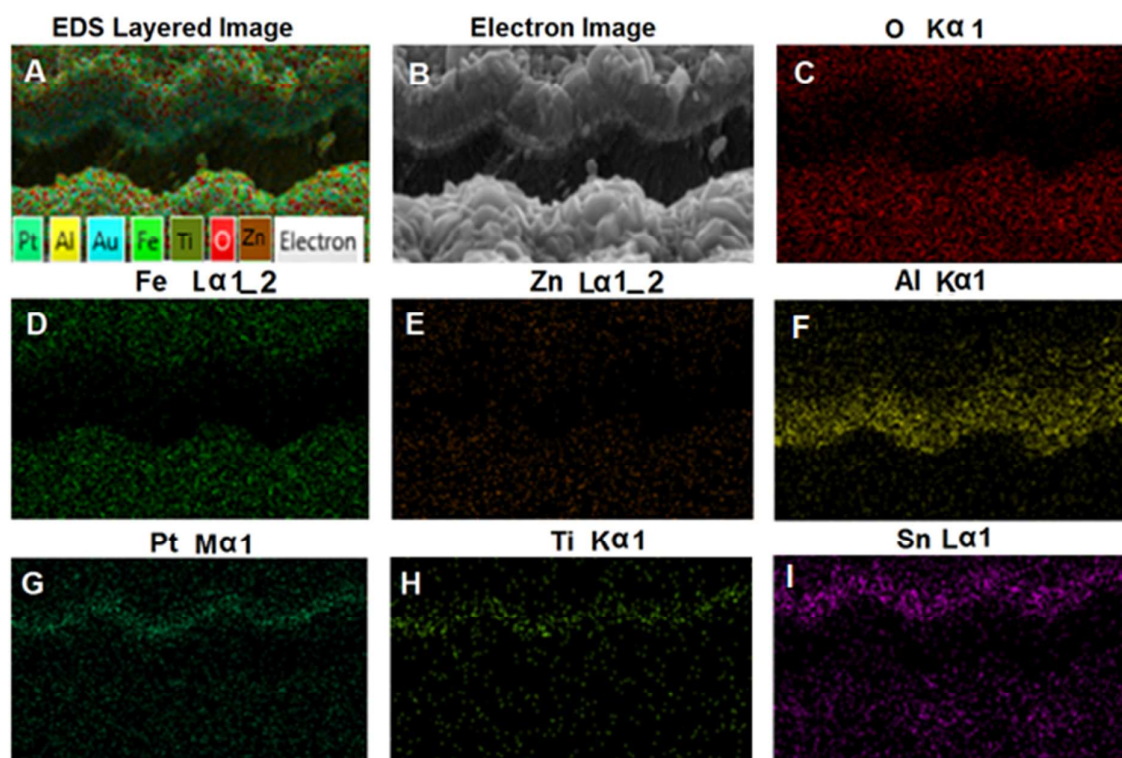

**Figure S2:** Energy dispersive X-Ray spectroscopic images of composite ZF2 deposited on 3D template.

# UV-Vis Study:

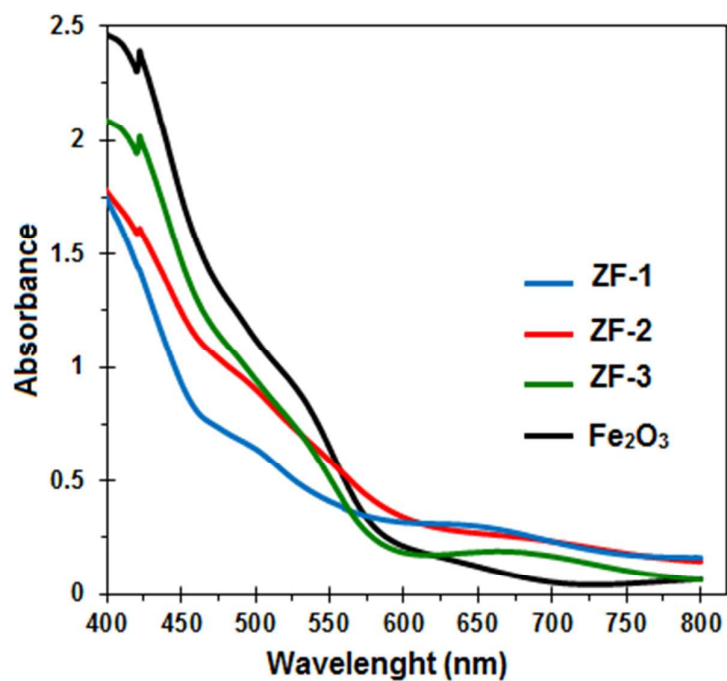

**Figure S3:** UV-Vis absorption spectra of composites,  $\alpha$ -Fe<sub>2</sub>O<sub>3</sub> (Black), ZF3 (Green), ZF2 (Red), and ZF1 (Blue) deposited on FTO coated glass.

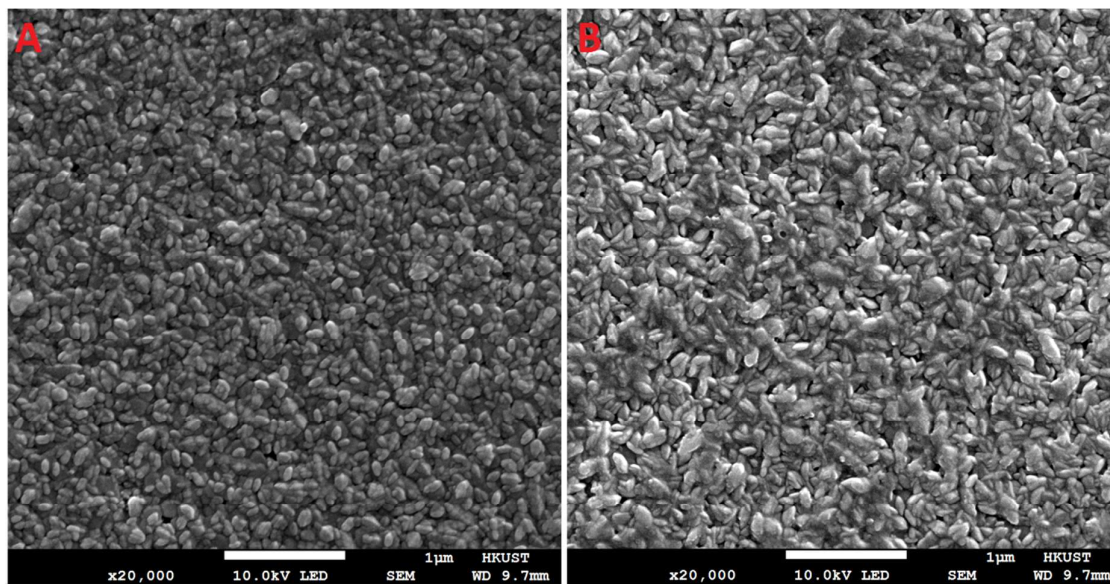

**Figure S4:** (A) Low magnification SEM images of ZnFe<sub>2</sub>O<sub>4</sub>/α-Fe<sub>2</sub>O<sub>3</sub> composite (ZF2), (B) Low magnification SEM images of ZnFe<sub>2</sub>O<sub>4</sub>/α-Fe<sub>2</sub>O<sub>3</sub> composite (ZF1).

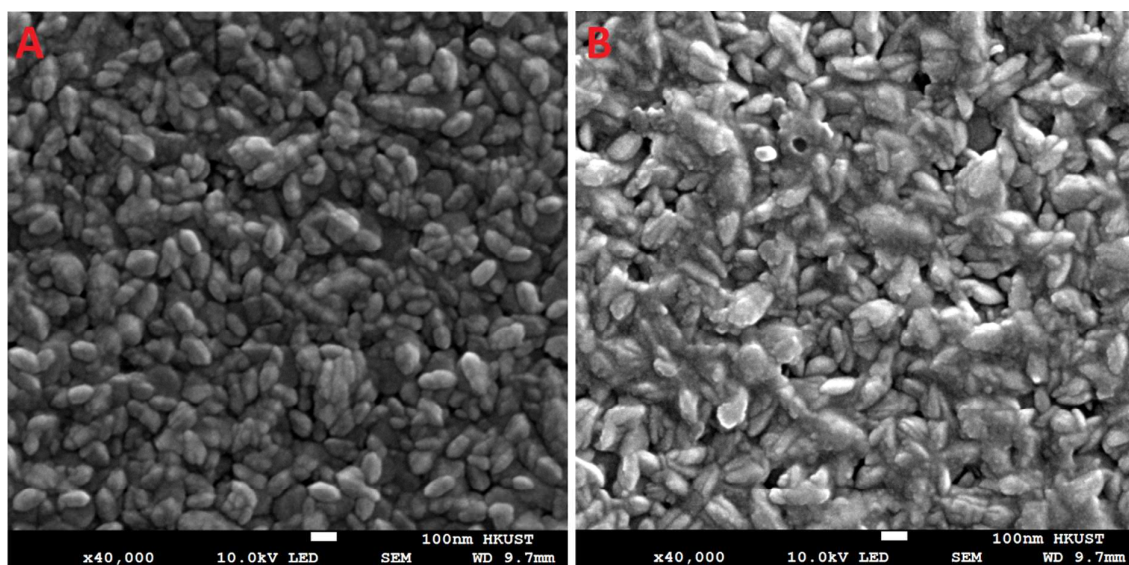

**Figure S5:** (A) High magnification SEM images of  $\text{ZnFe}_2\text{O}_4/\alpha\text{-Fe}_2\text{O}_3$  composite (ZF2), (B) High magnification SEM images of  $\text{ZnFe}_2\text{O}_4/\alpha\text{-Fe}_2\text{O}_3$  composite (ZF1).

**Table S1:** Molar concentrations of the precursor solutions used and percent composition obtained from XRF analysis.

| Code | Molar<br>Concentration of<br>$\text{FeCl}_3 \cdot 6\text{H}_2\text{O}$ | Molar<br>Concentration of<br>$\text{ZnCl}_2 \cdot 2\text{H}_2\text{O}$ | Composition:<br>Fe : Zn |    | Composition:<br>$\text{ZnFe}_2\text{O}_4$ , $\text{Fe}_2\text{O}_3$ |                         |
|------|------------------------------------------------------------------------|------------------------------------------------------------------------|-------------------------|----|---------------------------------------------------------------------|-------------------------|
|      |                                                                        |                                                                        | Fe                      | Zn | $\text{ZnFe}_2\text{O}_4$                                           | $\text{Fe}_2\text{O}_3$ |
| ZF1  | 0.05                                                                   | 0.25                                                                   | 4                       | 1  | 1                                                                   | 1                       |
| ZF2  | 0.05                                                                   | 0.15                                                                   | 6                       | 1  | 1                                                                   | 2                       |
| ZF3  | 0.05                                                                   | 0.1                                                                    | 8                       | 1  | 1                                                                   | 3                       |
